# Supplementary material for: KIAA0101 as a new diagnostic and prognostic marker, and its correlation with gene regulatory networks and immune infiltrates in lung adenocarcinoma
Source: publisher site journal article supplement (doi:10.18632/aging.104144), 2020-11-20
Supplement: Supplementary file [file aging-v13i1-104144-supplementary-material-SD1.pdf]

## SUPPLEMENTARY TABLES

Supplementary Table 1. Details of the eight domain chains of KIAA0101.

| Serial number | ID     | POSITION | IDENTITY |      |       | MAX IDENTITY | RESOLUTION | IN COMPLEX WITH | EXPERIMENT TYPE   | INTERFACE CAVITY |
|---------------|--------|----------|----------|------|-------|--------------|------------|-----------------|-------------------|------------------|
|               |        |          | START    | STOP | SCORE |              |            |                 |                   |                  |
| A             | 4D2G_D | 52 - 69  | 52       | 69   | 100   | 100          | 2.65 Å     | PCNA            | X-RAY DIFFRACTION | √                |
| B             | 4D2G_E | 52 - 69  | 52       | 69   | 100   | 100          | 2.65 Å     | PCNA            | X-RAY DIFFRACTION | √                |
| C             | 6EHT_D | 52 - 71  | 52       | 71   | 100   | 100          | 3.2Å       | PCNA            | X-RAY DIFFRACTION | √                |
| D             | 6EHT_E | 52 - 71  | 52       | 71   | 100   | 100          | 3.2Å       | PCNA            | X-RAY DIFFRACTION | √                |
| E             | 6GWS_D | 41-72    | 41       | 72   | 100   | 100          | 3.2Å       | PCNA            | X-RAY DIFFRACTION | √                |
| F             | 6GWS_E | 41-72    | 41       | 72   | 100   | 100          | 2.9Å       | PCNA            | X-RAY DIFFRACTION | √                |
| G             | 6GWS_F | 41-72    | 41       | 72   | 100   | 100          | 2.9Å       | PCNA            | X-RAY DIFFRACTION | √                |
| H             | 6IIW_B | 2-11     | 2        | 11   | 100   | 100          | 1.699Å     | UHRF1           | X-RAY DIFFRACTION | √                |

**Supplementary Table 2. Significantly enriched gene ontology (GO) annotations (cellular components) of KIAA0101 in lung adenocarcinoma (LinkedOmics).**

| Description                   | Leading EdgeNum | FDR | Leading Edge Gene                                                                                                                                                                                                                                                                                                                                                                                                                                                                                                                                                                                                                                                                                                                                                                                                                                                                                                                                                                                                                                                                                                                                                                                                              |
|-------------------------------|-----------------|-----|--------------------------------------------------------------------------------------------------------------------------------------------------------------------------------------------------------------------------------------------------------------------------------------------------------------------------------------------------------------------------------------------------------------------------------------------------------------------------------------------------------------------------------------------------------------------------------------------------------------------------------------------------------------------------------------------------------------------------------------------------------------------------------------------------------------------------------------------------------------------------------------------------------------------------------------------------------------------------------------------------------------------------------------------------------------------------------------------------------------------------------------------------------------------------------------------------------------------------------|
| condensed chromosome          | 66              | 0   | RAD51, SPC25, CCNB1, BIRC5, NCAPG, ZWINT, MAD2L1, SKA3, NUF2, BUB1B, CENPA, SKA1, AURKB, NEK2, CENPW, HJURP, NDC80, CDCA5, NCAPH, BUB1, ZWILCH, CENPK, KIF2C, AURKA, CENPN, TOP2A, CENPM, PLK1, ERCC6L, CDT1, CHEK1, SPAG5, CENPH, SPC24, NUP37, BLM, CENPE, BUB3, CDK2, FANCD2, CENPO, CENPF, BRCA1, DSN1, MKI67, NCAPG2, H2AFX, HMGB2, SUV39H1, CBX3, TUBG1, KNTC1, PPP1CC, SMC2, BANF1, NCAPD2, SKA2, NUP107, BRCA2, NUP85, ITGB3BP, SYCE2, TOPBP1, DMC1, SMC4, INCENP.                                                                                                                                                                                                                                                                                                                                                                                                                                                                                                                                                                                                                                                                                                                                                     |
| chromosomal region            | 94              | 0   | RAD51, OIP5, CDK1, SPC25, CCNB1, BIRC5, NCAPG, ZWINT, MAD2L1, SKA3, NUF2, BUB1B, CENPA, SKA1, AURKB, NEK2, ESCO2, CENPW, HJURP, TTK, NDC80, CDCA5, BUB1, ZWILCH, CENPK, KIF2C, AURKA, DSCC1, CENPN, CDCA8, CENPM, PLK1, MCM6, ERCC6L, CDT1, HELLS, CHEK1, SPAG5, CENPH, PCNA, SPC24, CENPI, NUP37, FEN1, CENPL, BLM, KIF18A, CENPE, MCM4, BUB3, SUV39H2, MCM2, CDK2, PIF1, DNA2, CENPO, CENPF, CHEK2, DSN1, H2AFX, MCM7, SUV39H1, MTBP, CBX3, RECQL4, KNTC1, PPP1CC, CENPP, CENPQ, PTGES3, NCAPD2, DYNLL1, SKA2, HAT1, NUP107, MCM5, MCM3, MSH2, BRCA2, NUP85, SSB, ITGB3BP, DMC1, INCENP, THOC3, XPO1, APEX1, XRCC5, KIF22, DCLRE1A, SEH1L, XRCC3, NSMCE2, RAD21.                                                                                                                                                                                                                                                                                                                                                                                                                                                                                                                                                             |
| mitochondrial protein complex | 152             | 0   | MRPL47, DNA2, MRPL11, MRPL42, TOMM5, MRPL3, MRPL21, NDUFA9, PPIF, MRPL13, NDUFA12, MRPL15, MRPS35, MRPL12, COX5A, CHCHD3, PNPT1, MRPS16, MRPL37, MRPS30, MRPL51, UQCRH, MRPS11, UQCRHL, MRPL52, MRPS15, MRPS22, TOMM40, MRPS12, MRPS17, TIMM8B, MRPS10, NDUFB5, TIMM9, MRPL35, COX7A2, NDUFB3, TIMM10, TIMM50, MRPL17, COX6A1, TOMM22, MRPL9, APOO, NDUFB4, MRPL48, MRPL27, MRPL30, MRPS7, CYC1, HSD17B10, MRPL44, MRPS33, VDACL1, MRPL36, MRPL22, PDK1, MRPS24, MRPL2, COX5B, UQCRFS1, CHCHD1, COX7A2L, C15orf48, ROMO1, NDUFS6, NDUFAB1, MRPL19, IMMT, MRPS18C, MRPL39, NDUFB9, MTX1, MRPL46, MRPL50, SUPV3L1, NDUFB6, MRPL32, SDHB, NDUFA8, TIMM17A, DAP3, MRPL16, NDUFB1, NDUFB8, UQCRC1, NDUFC2, GRPEL2, MFN1, MRPS5, MRPL18, NDUFA1, NDUFS3, GRPEL1, NDUFS1, MRPL10, NDUFS5, NDUFA6, NDUFV2, TIMM17B, MRPS28, DNAJC19, MTX2, UQCRQ, NDUFB11, MRPL33, MRPS9, IMMP1L, C12orf65, MRPL40, NDUFC1, SUCLG1, NDUFB2, MRPS14, NDUFS8, PARK7, DLAT, MRPS18A, KIAA0391, MRPL53, TOMM6, UQCRB, COX4I1, NDUFA11, NDUFA7, TIMM13, MRPL34, NDUFA4, NDUFA3, MRPS2, MRPS21, BCS1L, MTG1, MRPL24, CLPX, MRPL38, CHCHD10, MRPL28, FOXRED1, TOMM40L, SDHD, PMPCB, MRPL43, MRPS26, MRPL20, MRPL41, MPV17L2, NDUFS4, NDUFA5, MRPS34, NDUFA13. |
| ribosome                      | 143             | 0   | MRPL47, MRPL11, MRPL42, DENR, MRPL3, MRPL21, ZC3H15, MRPL13, MRPL15, MRPS35, MRPL12, HSPA14, PNPT1, MRPS16, MRPL37, MRPS30, MRPL51, MRPS11, MRPL52, MRPS15, MRPS22, MRPS12, MRPS17, MRPS10, MRPL35, MRPL17, NAA10, MRPL9, MRPL48, MRPL27, MRPL30, MRPS7, RPLP0, RPL39L, MRPL44, MRPS33, MRPL1, RPS7, MRPL36, RSL24D1, APEX1, MRPS23, MRPL22, PTCO3, MRPS24, MRPL2, EIF2AK2, CHCHD1, RPL22L1, NDUFAB1, MRPL19, MRPS18C, MRPL39, RPL27, MRPL46, MRPL50, MRPL32, DAP3, RPL26L1, MRPL16, RPL35A, RPL38, MRPS5, MRPL18, RPS19, RPS27A, LARP4, MRPL10, GADD45GIP1, RPL39, RPS16, MRPS28, RPS17, RPS10, RPL35, MCTS1, RPS21, NUFIP1, MRPL33, MRPS9, RPS3, C12orf65, MRPL40, RPS26, MRPS14, NCK1, RPSA, EIF2A, MRPS18A, MRPL53, RPL36A, RPS29, RPS18, RPL4, RPL7L1, RPL37, RPL24, RPL6, RPL8, RPL41, NDUFA7, MRPL34, RPL19, RPL23A, AURKAIP1, MRPS2, MRPS21, MTG1, MRPL24, ZNF622, MRPL38, RPS5, RPL30, MRPL28, RPLP1, RPS24, RPS15A, RPL31, EIF3H, MRPL43, NR0B1, RPS8, MRPS26, MRPL20, RPL18A, MRPL41, MPV17L2, MRPS34, RPL37A, RPL27A, RPL36AL, MRPL14, RPL18, RPL7A, RPS12, MRPL49, RPL5, RPS11, RPS15, RPS2, RPL23, RPL32, NSUN3.                                                                                                 |
| spindle                       | 70              | 0   | CDK1, NUSAP1, CCNB1, BIRC5, MAD2L1, SKA3, KIF23, BUB1B, CDC6, PRC1, SKA1, AURKB, NEK2, TTK, CDC20, DLGAP5, KIF11, KIF20A, AURKA, RACGAP1, TPX2, KIFC1, KIF4A, CDCA8, PLK1, POC1A, CKAP2L, KIF15, SPAG5, SHCBP1, KIF18B, KIF14, ASPM, KIF18A, VRK1, ESPL1, ECT2, CENPE, TACC3, CKAP2, FAM83D, PSRC1, FBXO5, CDC7, KIF20B, CENPF, DSN1, CBX3, TUBG1, KNTC1, BCCIP, HAUS1, DYNLL1, SKA2, WDR62, RAE1, NUP85, TOPBP1, INCENP, HAUS2, HAUS6, MAPRE1, MAD2L2, HAUS8, KIF22, POC1B, CDC27, PRPF19, NEDD1, RAB11A.                                                                                                                                                                                                                                                                                                                                                                                                                                                                                                                                                                                                                                                                                                                     |

Abbreviations: LeadingEdgeNum, the number of leading edge genes; FDR, false discovery rate from Benjamini and Hochberg from gene set enrichment analysis (GSEA).

**Supplementary Table 3. Significantly enriched gene ontology (GO) annotations (biological processes) of KIAA0101 in lung adenocarcinoma (LinkedOmics).**

| Description                | Leading EdgeNum | FDR | Leading Edge Gene                                                                                                                                                                                                                                                                                                                                                                                                                                                                                                                                                                                                                                                                                                                                                                                                                                                                                                                                                                                                                                                                                                                                                                                                                                                                                                                                             |
|----------------------------|-----------------|-----|---------------------------------------------------------------------------------------------------------------------------------------------------------------------------------------------------------------------------------------------------------------------------------------------------------------------------------------------------------------------------------------------------------------------------------------------------------------------------------------------------------------------------------------------------------------------------------------------------------------------------------------------------------------------------------------------------------------------------------------------------------------------------------------------------------------------------------------------------------------------------------------------------------------------------------------------------------------------------------------------------------------------------------------------------------------------------------------------------------------------------------------------------------------------------------------------------------------------------------------------------------------------------------------------------------------------------------------------------------------|
| chromosome segregation     | 97              | 0   | OIP5, NUSAP1, SPC25, CCNB1, BIRC5, NCAPG, ZWINT, MAD2L1, SKA3, NUF2, KIF23, BUB1B, CDC6, PRC1, SKA1, AURKB, NEK2, ESCO2, CENPW, CEP55, HJURP, TTK, CDC20, DLGAP5, NDC80, CDCA5, NCAPH, BUB1, KIF2C, RACGAP1, DSCC1, KIFC1, KIF4A, CENPN, CDCA8, TOP2A, PLK1, CDT1, SPAG5, RAN, KIF18B, KIF14, PTTG1, NUP37, FEN1, TRIP13, BLM, KIF18A, ESPL1, ECT2, CCNE2, EME1, CENPE, TACC3, FAM83D, BUB3, PSRC1, FBXO5, FANCD2, CENPF, BRCA1, DSN1, CCNE1, MKI67, BRIP1, TUBG1, KIF4B, CENPQ, ACTR3, SMC2, GEN1, NCAPD2, SKA2, NAA50, SYCE2, NAA10, DMC1, SMC4, INCENP, RAD51C, RAD18, RMI1, SRPK1, ANAPC5, MAD2L2, KIF22, KPNB1, FANCM, PHB2, SEH1L, XRCC3, CDC27, NSMCE2, RAD21, ANAPC11, RCC1, RAB11A, RAD51, CDK1, CDC45, RRM2, CCNA2, CDC6, EXO1, ESCO2, MCM10, GINS1, GINS2, DSCC1, POLE2, MCM6, DTL, CDT1, CHEK1, RFC4, TIPIN, PCNA, DBF4, FEN1, BLM, GMNN, RNASEH2A, RFC5, RFC3, CCNE2, EME1, POLQ, MCM4, GINS4, RFC2, GINS3, MCM2, PRIM1, CDK2, FBXO5, CDC7, PIF1, DNA2, BRCA1, CHEK2, E2F8, CCNE1, POLA2, CHAF1B, BRIP1, WDHD1, DONSON, MCM7, TIMELESS, CLSPN, E2F7, RECQL4, SSBP1, SLBP, HMGA1, DUT, RPA3, CHAF1A, GEN1, STOML2, ATAD5, RRM1, RNASEH1, MCM5, MCM3, BRCA2, MCM8, GTPBP4, POLE3, DBF4B, RBBP7, RMI1, MSH6, SET, FANCM, RFWD3, POLD2, DNAJC2, PRIM2, NBN, FAF1, PPP2CA, KIN, CDK2AP1, RBBP8, POLE, SSRP1, LIG1, ATF1, POLD3, ZRANB3, DDX11, CDC34. |
| DNA replication            | 96              | 0   | CDK1, CCNB1, ZWINT, MAD2L1, CDC45, BUB1B, CDC6, AURKB, CDC25C, TTK, CDC20, NDC80, BUB1, ZWILCH, AURKA, GTSE1, TOP2A, PLK1, DTL, CDT1, CHEK1, TIPIN, PCNA, WDR76, TRIP13, BLM, EME1, BUB3, CDK2, E2F1, DNA2, CENPF, BRCA1, CHEK2, E2F8, BRIP1, H2AFX, DONSON, TIMELESS, CLSPN, E2F7, TRIAP1, KNTC1, GEN1, MSH2, PRMT1, TOPBP1, MSH6, MAD2L2, XRCC3, RFWD3, PRPF19, RINT1, TIPRL, NAE1, INTS7, NBN, ZNF207, PSMG2, TFDP1.                                                                                                                                                                                                                                                                                                                                                                                                                                                                                                                                                                                                                                                                                                                                                                                                                                                                                                                                       |
| cell cycle checkpoint      | 60              | 0   | RAD51, CDC45, EXO1, ESCO2, RAD51AP1, CDCA5, GINS2, RAD54L, FOXM1, CHEK1, FEN1, TRIP13, BLM, EME1, RAD54B, PSMD14, FANCB, POLQ, GINS4, XRCC2, CDC7, DNA2, BRCA1, CHEK2, BRIP1, H2AFX, TIMELESS, UBE2N, RECQL4, UBE2V2, RPA3, GEN1, MSH2, BRCA2, MCM8, DMC1, SUMO1, RAD51C, PARP2, YY1, FIGNL1, RMI1, XRCC5, MAD2L2, PPP4C, DCLRE1A, DEK, XRCC3, RFWD3, NSMCE2, RAD21, PRPF19, DDX1, NBN, APTX, SFPQ, RBBP8, RECQL, TDP1, KDM1A, TDP2.                                                                                                                                                                                                                                                                                                                                                                                                                                                                                                                                                                                                                                                                                                                                                                                                                                                                                                                          |
| double-strand break repair | 61              | 0   | SPC25, CCNB1, NUF2, KIF23, PRC1, AURKB, NEK2, TTK, CDC20, NDC80, KIF11, AURKA, RACGAP1, TPX2, MYBL2, KIFC1, KIF4A, PLK1, POC1A, SPAG5, RAN, ASPM, ESPL1, CENPE, TACC3, STIL, PSRC1, FBXO5, CHEK2, STMN1, TUBB, TUBG1, KIF4B, BCCIP, HAUS1, WDR62, RAE1, HAUS2, HAUS6, MAPRE1, HAUS8, KPNB1, RCC1, RAB11A.                                                                                                                                                                                                                                                                                                                                                                                                                                                                                                                                                                                                                                                                                                                                                                                                                                                                                                                                                                                                                                                     |
| spindle organization       | 44              | 0   |                                                                                                                                                                                                                                                                                                                                                                                                                                                                                                                                                                                                                                                                                                                                                                                                                                                                                                                                                                                                                                                                                                                                                                                                                                                                                                                                                               |

Abbreviations: LeadingEdgeNum, the number of leading edge genes; FDR, false discovery rate from Benjamini and Hochberg from gene set enrichment analysis (GSEA).

**Supplementary Table 4. Significantly enriched gene ontology (GO) annotations (molecular functions) of KIAA0101 in lung adenocarcinoma (LinkedOmics).**

| Description                        | Leading Edge Num | FDR | Leading Edge Gene                                                                                                                                                                                                                                                                                                                                                                                                                                                                                                                                                                                                                                                                                                                                                                                                                                                                                             |
|------------------------------------|------------------|-----|---------------------------------------------------------------------------------------------------------------------------------------------------------------------------------------------------------------------------------------------------------------------------------------------------------------------------------------------------------------------------------------------------------------------------------------------------------------------------------------------------------------------------------------------------------------------------------------------------------------------------------------------------------------------------------------------------------------------------------------------------------------------------------------------------------------------------------------------------------------------------------------------------------------|
| structural constituent of ribosome | 109              | 0   | MRPL47, MRPL11, MRPL42, MRPL3, MRPL21, MRPL13, MRPL15, MRPS35, MRPL12, MRPS16, MRPL37, MRPS30, MRPL51, MRPS11, MRPL52, MRPS15, MRPS22, MRPS12, MRPS17, MRPL35, MRPL17, MRPL9, MRPL27, MRPL30, MRPS7, RPLP0, RPL39L, MRPS33, MRPL1, RPS7, MRPL36, RSL24D1, MRPS23, MRPL22, MRPS24, MRPL2, RPL22L1, MRPL19, MRPS18C, RPL27, MRPL46, MRPL32, DAP3, RPL26L1, MRPL16, RPL35A, RPL38, MRPS5, MRPL18, RPS19, RPS27A, MRPL10, RPL39, RPS16, RPS17, RPS10, RPL35, RPS21, MRPL33, MRPS9, RPS3, RPS26, MRPS14, RPSA, MRPS18A, RPL36A, RPS29, RPS18, RPL4, RPL7L1, RPL37, RPL24, RPL6, RPL8, RPL41, NDUFA7, MRPL34, RPL19, RPL23A, MRPS2, MRPS21, MRPL24, RPS5, RPL30, MRPL28, RPLP1, RPS24, RPS15A, RPL31, MRPL43, RPS8, MRPL20, RPL18A, MRPL41, MRPS34, RPL37A, RPL27A, RPL36AL, MRPL14, RPL18, RPL7A, RPS12, MRPL49, RPL5, RPS11, RPS15, RPS2, RPL23, RPL32.                                                           |
| catalytic activity, acting on DNA  | 69               | 0   | RAD51, CDC45, EXO1, GINS1, GINS2, TOP2A, POLE2, MCM6, RAD54L, ERCC6L, PCNA, NEIL3, FEN1, BLM, NME1, EME1, RAD54B, POLQ, MCM4, GINS4, UNG, PIF1, DNA2, POLA2, BRIP1, MCM7, TDG, RECQL4, DKC1, HMGA1, PTGES3, GEN1, ALKBH2, RUVBL1, DMC1, POLE3, DNMT3B, RAD51C, APEX1, XRCC5, DCLRE1A, SMUG1, FANCM, XRCC3, POLE4, RUVBL2, POLD2, SUPV3L1, DDX1, DHX36, NBN, APTX, TATDN1, RBBP8, RECQL, POLE, TERT, LIG1, TDP1, CHRAC1, POLD3, TDP2, ZRANB3, METTL4, DDX11, G3BP1, RPS3, POLB, APEX2.                                                                                                                                                                                                                                                                                                                                                                                                                         |
| single-stranded DNA binding        | 43               | 0   | RAD51, CDC45, MCM10, RAD51AP1, MCM6, NEIL3, BLM, NME1, MCM4, PRIM1, HMGB2, HSPD1, MCM7, RECQL4, SSBP1, RPA3, SMC2, GEN1, POLR2H, MSH2, TSN, BRCA2, YBX1, POLR2D, DMC1, SMC4, SUB1, POLR2G, RAD18, NUP35, LRPPRC, DHX36, PRIM2, HMGB1, APTX, CNBP, RAD23B, RBBP8, WBP11, TDP1, TDP2, POT1, DDX11.                                                                                                                                                                                                                                                                                                                                                                                                                                                                                                                                                                                                              |
| helicase activity                  | 43               | 0   | CDC45, GINS1, GINS2, MCM6, RAD54L, ERCC6L, HELLS, BLM, RAD54B, MCM4, GINS4, MCM2, PIF1, DNA2, BRIP1, MCM7, EIF4A3, RECQL4, MCM5, MCM3, RUVBL1, MCM8, DDX47, DDX52, TTF2, DDX55, EIF4A1, XRCC5, FANCM, RUVBL2, DDX18, SUPV3L1, DDX1, DHX36, NBN, DDX56, HLTf, RECQL, GTF2F2, DDX23, DDX10, ZRANB3, DDX11.                                                                                                                                                                                                                                                                                                                                                                                                                                                                                                                                                                                                      |
| catalytic activity, acting on RNA  | 122              | 0   | EXO1, FEN1, RNASEH2A, RAD54B, PRIM1, PIF1, FARSB, CPSF3, EIF4A3, RPP30, EXOSC2, POP7, PNPT1, TARS, PTRH2, METTL2A, EXOSC8, RNASEH1, DARS, POLR2H, MARS, POP1, TSN, YARS2, EXOSC3, EMG1, DUS4L, POLR2D, POLR3G, FBL, EXOSC9, POLR2K, MRPL44, POLR2G, RPP40, GARS, DARS2, EIF4A1, APEX1, PUS1, EXOSC1, NOP2, METTL8, RPP25, DDX18, TRMT61B, SUPV3L1, POLR2J, ZNRD1, GATC, TRMT112, POP5, RARS, DDX1, METTL1, POLR1C, DHX36, PRIM2, METTL2B, POLR2I, DDX56, PPP1R8, TSEN15, POLR2F, IARS, METTL6, RBMX2, RPP38, TERT, CARS, POP4, DDX23, EXOSC5, DDX10, TDP2, NSUN2, KARS, FTSJ1, MARS2, EXOSC4, RPP21, G3BP1, EDC3, POLR3F, DTD1, NARS, ERI1, KIAA0391, MED20, WDR4, DHX37, DHX15, RNASEH2B, QRSL1, POLR3K, TWISTNB, ERI3, TRIT1, NARS2, TRMT12, TRPT1, DDX21, FARSA, YARS, WARS, SARS2, TFB2M, CNOT7, TRMT5, TGS1, DCPS, PUS3, ISG20L2, POLR2B, THUMPD3, DBR1, CDKAL1, THUMPD2, TFB1M, RARS2, EXOSC10, POLR3D. |

Abbreviations: LeadingEdgeNum, the number of leading edge genes; FDR, false discovery rate from Benjamini and Hochberg from gene set enrichment analysis (GSEA).

**Supplementary Table 5. Significantly enriched Kyoto Encyclopedia of Genes and Genomes (KEGG) pathway annotations of KIAA0101 in lung adenocarcinoma (LinkedOmics).**

| Description     | Leading EdgeNum | FDR | Leading Edge Gene                                                                                                                                                                                                                                                                                                                                                                                                                                                                                                                                                                                                                                                                                                                                                                                                                                                                                                                                                                                                                                                                                   |
|-----------------|-----------------|-----|-----------------------------------------------------------------------------------------------------------------------------------------------------------------------------------------------------------------------------------------------------------------------------------------------------------------------------------------------------------------------------------------------------------------------------------------------------------------------------------------------------------------------------------------------------------------------------------------------------------------------------------------------------------------------------------------------------------------------------------------------------------------------------------------------------------------------------------------------------------------------------------------------------------------------------------------------------------------------------------------------------------------------------------------------------------------------------------------------------|
| Cell cycle      | 48              | 0   | CCNB2, CDK1, CCNB1, MAD2L1, CDC45, BUB1B, CCNA2, CDC6, CDC25C, TTK, CDC20, BUB1, CDC25A, PLK1, MCM6, CHEK1, PCNA, DBF4, PTTG1, ESPL1, PKMYT1, CCNE2, MCM4, BUB3, MCM2, CDK2, E2F1, CDC7, CHEK2, CCNE1, E2F2, MCM7, ANAPC7, YWHAQ, SKP2, MCM5, MCM3, HDAC2, CDK4, YWHAZ, ANAPC5, MAD2L2, YWHAG, RBL1, CDC27, E2F3, RAD21, ANAPC11, MRPL11, MRPL3, MRPL21, MRPL13, MRPL15, MRPL12, MRPS16, MRPS11, MRPS15, MRPS12, MRPS17, MRPS10, MRPL35, MRPL17, MRPL9, MRPL27, MRPL30, MRPS7, RPLP0, MRPL1, RPS7, MRPL36, RSL24D1, MRPL22, MRPL2, RPL22L1, MRPL19, MRPS18C, RPL27, MRPL32, RPL26L1, MRPL16, RPL35A, RPL38, MRPS5, MRPL18, RPS19, RPS27A, MRPL10, RPL39, RPS16, RPS17, RPS10, RPL35, RPS21, MRPL33, MRPS9, RPS3, RPS26, MRPS14, RPSA, MRPS18A, RPL36A, RPS29, RPS18, RPL4, RPL37, RPL24, RPL6, RPL8, RPL41, MRPL34, RPL19, RPL23A, MRPS2, MRPS21, MRPL24, FAU, RPS5, RPL30, MRPL28, RPL1, RPS24, RPS15A, RPL31, RPS8, MRPL20, RPL18A, RPL37A, RPL27A, RPL36AL, MRPL14, RPL18, RPL7A, RPS12, RPL5, RPS11, RPS15, RPS2, RPL23, RPL32, UBA52, RPL36, MRPL4, RPL17, RPS20, RPS3A, RPL29, RPS13, RPL10L. |
| Ribosome        | 100             | 0   | PSMD14, PSMA4, PSMD12, PSMA5, PSMB3, PSMA2, PSMB7, POMP, PSMB5, PSMA3, PSMD11, PSMC4, PSMA7, PSMC6, PSMA1, PSMA6, PSMC2, PSMB4, PSME2, PSMC1, PSMB2, PSMB1, PSME3, PSMD3, PSMB6, PSMC3, PSMD7, PSMD2, PSMD13, PSMD4, PSMD8, PSMD1, PSMD6, PSME4, ADRM1, IFNG, PSMB8, PSMB9, PSMC5, PSME1.                                                                                                                                                                                                                                                                                                                                                                                                                                                                                                                                                                                                                                                                                                                                                                                                           |
| Proteasome      | 40              | 0   | SNRPA1, SNRPD1, SNRPF, SNRPG, LSM5, SNRPB, HNRNPC, MAGOHB, EIF4A3, LSM2, SMNDC1, SNRPE, PPIL1, SNRPC, PHF5A, PPIH, MAGOH, SNRPD2, PRPF4, SNRPB2, LSM4, LSM3, SNRNP27, SNRPA, TRA2B, BUD31, THOC3, RBM17, USP39, PRPF40A, EFTUD2, SNRPD3, PRPF19, LSM6, ISY1, SNRNP40, CWC15, NCBP1, WBP11, DDX23, LSM7, NCBP2, TXNL4A, SF3B5, BCAS2, U2AF2, PUF60, RBMX, HNRNPK, SNW1, U2AF1, PLRG1, DHX15, PCBP1, SF3B4, HNRNPA1, SF3A3, CDC5L, PRPF38A, TCERG1, PQBP1, HSPA1B, HNRNPA1L2.                                                                                                                                                                                                                                                                                                                                                                                                                                                                                                                                                                                                                         |
| Spliceosome     | 63              | 0   | POLE2, MCM6, RFC4, PCNA, FEN1, RNASEH2A, RFC5, RFC3, MCM4, RFC2, MCM2, PRIM1, DNA2, POLA2, MCM7, SSBP1, RPA3, RNASEH1, MCM5, MCM3, POLE3, POLE4, POLD2, PRIM2, POLE, LIG1, POLD3.                                                                                                                                                                                                                                                                                                                                                                                                                                                                                                                                                                                                                                                                                                                                                                                                                                                                                                                   |
| DNA replication | 27              | 0   |                                                                                                                                                                                                                                                                                                                                                                                                                                                                                                                                                                                                                                                                                                                                                                                                                                                                                                                                                                                                                                                                                                     |

Abbreviations: LeadingEdgeNum, the number of leading edge genes; FDR, false discovery rate from Benjamini and Hochberg from gene set enrichment analysis (GSEA).

**Supplementary Table 6. Significantly enriched kinase-target networks of KIAA0101 in lung adenocarcinoma (LinkedOmics).**

| Description  | Leading EdgeNum | FDR | Leading Edge Gene                                                                                                                                                                                                                                                                                                                                                                                                                                                                                                      |
|--------------|-----------------|-----|------------------------------------------------------------------------------------------------------------------------------------------------------------------------------------------------------------------------------------------------------------------------------------------------------------------------------------------------------------------------------------------------------------------------------------------------------------------------------------------------------------------------|
| Kinase_CDK1  | 74              | 0   | NUSAP1, CCNB1, BIRC5, PBK, NCAPG, RRM2, BUB1B, CENPA, PRC1, CDC25C, CEP55, CDC20, DLGAP5, CDCA5, BUB1, KIF11, KIF2C, TPX2, TK1, TOP2A, CDC25A, DTL, FOXM1, ERCC6L, CHEK1, RFC4, SPAG5, FEN1, BLM, ESPL1, UHRF1, RFC5, RFC3, ECT2, NME1, CKAP2, TMPO, RFC2, E2F1, UNG, CDC7, KIF20B, EZH2, LMNB1, BRCA1, PAICS, MKI67, STMN1, FANCG, EIF4EBP1, MCM7, GMPS, SLBP, MAPK6, HMGA1, DUT, NME2, BRCA2, LDHA, ZC3HC1, FBXO43, LMNB2, XPO1, KIF22, USP14, DNMI1L, CDC27, ANAPC11, NEDD1, CSNK2B, RCC1, LBR, USP1, PPP1CA.       |
| Kinase_PLK1  | 32              | 0   | RAD51, CCNB1, BIRC5, BUB1B, CDC6, PRC1, CDC25C, CEP55, KIF2C, RACGAP1, GTSE1, TOP2A, CDC25A, FOXM1, ERCC6L, RAN, ESPL1, PKMYT1, STIL, FBXO5, BRCA1, CHEK2, CLSPN, ANAPC7, CENPQ, RUVBL1, BRCA2, FBXO43, YY1, CDC27, NEDD1, SUZ12.                                                                                                                                                                                                                                                                                      |
| Kinase_AURKB | 35              | 0   | NUSAP1, BIRC5, KIF23, CENPA, AURKB, NDC80, CDCA5, KIF2C, RACGAP1, CDCA2, KIF4A, CDCA8, PLK1, SHCBP1, CKAP2, DSN1, MKI67, HIST1H3B, DDX52, INCENP, PPHLN1, YY1, CCDC86, DEK, HIST1H3C, HIST1H3I, HMG2, MPHOSPH10, HIST1H3F, NSUN2, RPS10, HIST1H3G, HIST1H3J, RBMX, KRT8.                                                                                                                                                                                                                                               |
| Kinase_CDK2  | 73              | 0   | RRM2, CCNA2, CDC6, CDC25C, CDC20, DLGAP5, NCAPH, TPX2, MYBL2, TK1, DTL, FOXM1, CDT1, CHEK1, DIAPH3, BLM, UHRF1, MCM4, MCM2, CDK2, E2F1, UNG, CDC7, EZH2, CENPF, BRCA1, CCNE1, PAICS, MKI67, E2F2, STMN1, MCM7, GMPS, EIF4A3, TUBG1, C9orf40, ANAPC7, HMGA1, NUP107, SKP2, C2orf49, MCM3, TSN, BRCA2, TFAM, ITGB3BP, ZC3HC1, TOPBP1, LMNB2, RAD18, ANAPC5, KIF22, RBL1, CEP76, DNMI1L, CDC27, E2F3, ANAPC11, CSNK2B, ERAL1, MTHFD1L, TBCE, PPP1CA, NBN, PYCR1, NPM1, SCML2, RBBP8, HIST1H1E, ANAPC10, MTA2, LIG1, TSR1. |
| Kinase_ATR   | 20              | 0   | FANCI, GINS2, CHEK1, DBF4, BLM, MCM2, E2F1, FANCD2, BRCA1, CHEK2, H2AFX, CLSPN, FANCA, MCM3, DCK, XRCC3, NBN, NPM1, RBBP8, TDP1.                                                                                                                                                                                                                                                                                                                                                                                       |

Abbreviations: LeadingEdgeNum, the number of leading edge genes; FDR, false discovery rate from Benjamini and Hochberg from gene set enrichment analysis (GSEA).

**Supplementary Table 7. Significantly enriched miRNA-target networks of KIAA0101 in lung adenocarcinoma (LinkedOmics).**

| Description            | Leading EdgeNum | FDR      | Leading Edge Gene                                                                                                                                                                                                                                                                                                                                                                                                                                                                                                                                                                                                                                                                                                                                                                                                                                                                                                                                                                                                                                                                                   |
|------------------------|-----------------|----------|-----------------------------------------------------------------------------------------------------------------------------------------------------------------------------------------------------------------------------------------------------------------------------------------------------------------------------------------------------------------------------------------------------------------------------------------------------------------------------------------------------------------------------------------------------------------------------------------------------------------------------------------------------------------------------------------------------------------------------------------------------------------------------------------------------------------------------------------------------------------------------------------------------------------------------------------------------------------------------------------------------------------------------------------------------------------------------------------------------|
| GAGCCTG,MIR-484        | 40              | 0.010236 | DPYSL2, EZH1, DLEC1, HSPG2, PTPRE, PLEKHH2, FOXO4, SCARA3, MYCBP2, HIPK1, PITPNA, NFIA, ZFYVE1, LBH, HTT, EDA, PRKCB, PTGER4, PRRT2, SLC6A1, TAF1L, SORBS2, FAM13A, FRMPD4, DACH1, TRIOBP, ZYG11B, KLF12, BCL11A, GAPVD1, KDM4A, MINK1, MAPKAPK2, HIVEP2, DENND5A, SNN, ACVR1B, HLA-DOB, PTPRF, WDR90.                                                                                                                                                                                                                                                                                                                                                                                                                                                                                                                                                                                                                                                                                                                                                                                              |
| CAGCACT,MIR-512-3P     | 53              | 0.025589 | HLF, PLEKHM1, TAL1, RTN4RL1, ATXN7, C1orf21, SGSM2, TLN1, TRIM3, UBL3, ATXN1, PTPRT, FOXN3, FEM1C, MLLT6, IP6K1, RNF38, TNRC6B, ETV1, GRM7, 8-Mar, PPP3CA, USP47, TP53INP1, ESRP2, TRHDE, MBNL2, PDIK1L, PCDHAC2, TRIM2, PCDHA10, PPFIA2, NTNG1, GIGYF1, KLHL3, ARHGEF3, RSNB1, MRPS25, HCN4, SYT8, ARHGEF10, NFIB, ZDHHC9, NEO1, BHLHE41, PCDHA3, PCDH10, FRMD4A, BAHD1, KCNKG, SLC2A4, XIAP, CDK19.                                                                                                                                                                                                                                                                                                                                                                                                                                                                                                                                                                                                                                                                                               |
| TTTGAC,MIR-19A,MIR-19B | 148             | 0.029684 | ZBTB4, CBX7, ADCY9, RAI2, DLC1, ROBO2, PRICKLE2, SMARCA2, TGFB2, HLF, SCARF1, MACF1, ST3GAL5, CACNA1C, RALGPS1, ERBB4, CNTFR, PARM1, WDFY3, RFX1, ZDHHC7, LRIG1, ARHGEF12, NCALD, PTK2B, RGL1, KLF13, RXRA, ATP11A, CYLD, MECP2, SRGAP3, KCNA4, RBMS3, FOXF2, OLFM1, ARHGAP1, MYLIP, ABR, SPEN, UBL3, ATXN1, ARC, SPRYD3, SH3D19, STAT5B, AFF1, TMEM63B, ATRX, HIPK1, FEM1C, CPEB4, TNRC6A, SLC24A4, MLLT6, RNF145, CREBL2, FOXP1, RTN1, RNF38, NBEA, TNRC6B, KCNS2, KLHL20, ETV1, MEF2D, S1PR1, SOX6, PTPRG, DLX3, LBH, TSC1, GRIN2A, INO80, CCND2, TGOLN2, SYBU, SLC9A1, GRM7, HECW2, ZEB2, PDE7B, MED26, ITPR1, ATP10A, MAGI2, BACE1, ADCY7, BMPR2, TRAK2, WDR47, LRRK1, PRRT3, TP53INP1, ARID4B, AKAP1, ESRP2, ANKRD12, PHLDA3, PDE5A, KIF3A, ZFPM2, ZFYVE26, COL19A1, EVI5L, ENPP5, SHANK2, EPC2, PLXNC1, BPTF, ARRDC4, MBNL2, MID1IP1, SMOG2, KIAA1217, ZMYND11, ARRDC3, UCP3, PCDHAC2, PHF12, MFSD6, EPN2, WBP2, CGN, PPARA, PCDHA10, RIN2, FZD8, BSN, VGLL4, SDC1, ID4, SLC24A3, OGT, IGF2R, DDX6, IGSF3, SOX5, TESK2, PCDHA3, MINK1, ARGLU1, PCDH10, SLAIN1, BTBD7, NAV3, MAP3K12, PRUNE2. |
| GACAATC,MIR-219        | 60              | 0.034546 | CGNL1, AKAP13, TGFB2, ZCCHC24, CELF2, EPHA4, ERG, CBFA2T3, FAM160A2, PTPRU, SH3D19, DDAH1, CPEB3, NR2C2, TACC1, HAS3, KLF9, SNRK, ZC3H12B, MEF2D, SOX6, ETV5, MKNK2, PIP5K1C, GTPBP1, SYNGAP1, AFF4, MFNG, INPP5J, TRHDE, THRB, TMEM98, PODXL, AGPAT3, RECK, PDZRN4, FBXL17, NCOA1, NTNG1, PDGFRA, CXXC5, PCDH17, ZNF827, EGR3, FZD4, BTBD7, FBXO3, ZNF609, CCDC28A, PHACTR2, MAPT, ERGIC1, CPEB2, SDK1, FAM120C, HOMER2, KIF1B, UBR1, RORB, FMNL2.                                                                                                                                                                                                                                                                                                                                                                                                                                                                                                                                                                                                                                                 |
| CCCAGAG,MIR-326        | 58              | 0.039237 | PLXNA2, CORO2B, PTCH1, SCARF1, KIAA0513, CELF2, ANKFY1, NCALD, H6PD, ZMIZ1, TLN1, BSDC1, SMAD6, ATXN1, SPRYD3, RPS6KA1, SEMA6D, RPS6KA3, UBXN10, VPS39, CIC, GNAO1, AHCYL2, MMP24, PALM, DIDO1, PTK7, PPP1R9B, SYNGAP1, CEBPA, TCF4, ATP8B2, FAIM2, EPN2, GGT7, RPGR, OGT, C9orf24, LRRC32, SSH2, NAV3, ST3GAL3, PAPP, ZNF609, KCNIP2, CRIM1, BRPF3, NRP1, LRRTM1, BCL11B, AGPAT4, DLGAP2, KLHL14, EGLN2, RALGAP1, NHS, SEC63, ATP2B2.                                                                                                                                                                                                                                                                                                                                                                                                                                                                                                                                                                                                                                                              |

Abbreviations: LeadingEdgeNum, the number of leading edge genes; FDR, false discovery rate from Benjamini and Hochberg from gene set enrichment analysis (GSEA).

**Supplementary Table 8. Significantly enriched transcription factor-target networks of KIAA0101 in lung adenocarcinoma (LinkedOmics).**

| Description | Leading EdgeNum | FDR | Leading Edge Gene                                                                                                                                                                                                                                                                                                                                                                                                                                                                                                                                                                                                                                                                               |
|-------------|-----------------|-----|-------------------------------------------------------------------------------------------------------------------------------------------------------------------------------------------------------------------------------------------------------------------------------------------------------------------------------------------------------------------------------------------------------------------------------------------------------------------------------------------------------------------------------------------------------------------------------------------------------------------------------------------------------------------------------------------------|
| E2F_Q6      | 87              | 0   | RAD51, CDK1, CDC45, RRM2, CDC6, H2AFZ, POLE2, CDC25A, ARHGAP11A, MCM6, DNAJC9, CDT1, PCNA, GMNN, SNRPD1, PKMYT1, RANBP1, TMPO, MCM4, GINS3, MCM2, FBXO5, E2F1, FANCD2, UNG, ZNF367, EZH2, ATAD2, E2F8, STMN1, POLA2, GAPDH, MCM7, SASS6, CLSPN, E2F7, PPP1CC, EED, PHF5A, GEN1, ATAD5, WDR62, MCM3, MSH2, MCM8, TOPBP1, SUMO1, TRA2B, CDCA7, DCK, HMGXB4, HIST1H2AH, KPNB1, RBL1, POLE4, E2F3, MXD3, TRMT6, DCTPP1, INTS7, HMG2, PPP1R8, CTDSPL2, KCND2, SYNGR4, POLD3, UXT, NOLC1, ZCCHC8, HNRNPR, SLC38A1, MRPL40, ACBD6, MTF2, NASP, PRPS1, MAZ, CAND1, SMC6, YBX2, HIST1H4A, EHP1, HNRNPD, AP4M1, HNRNPA1, PRKDC, PCSK1.                                                                    |
| VE2F_Q4     | 86              | 0   | RAD51, CDK1, CDC45, RRM2, CDC6, H2AFZ, POLE2, CDC25A, ARHGAP11A, MCM6, DNAJC9, CDT1, PCNA, GMNN, SNRPD1, PKMYT1, RANBP1, TMPO, MCM4, GINS3, MCM2, FBXO5, E2F1, FANCD2, UNG, ZNF367, EZH2, ATAD2, E2F8, STMN1, POLA2, GAPDH, MCM7, SASS6, CLSPN, E2F7, PPP1CC, EED, PHF5A, GEN1, ATAD5, WDR62, MCM3, MSH2, MCM8, TOPBP1, SUMO1, TRA2B, CDCA7, DCK, HMGXB4, HIST1H2AH, KPNB1, RBL1, POLE4, E2F3, MXD3, TRMT6, DCTPP1, INTS7, HMG2, PPP1R8, CTDSPL2, KCND2, SYNGR4, POLD3, UXT, NOLC1, ZCCHC8, HNRNPR, SLC38A1, MRPL40, ACBD6, MTF2, NASP, PRPS1, MAZ, CAND1, SMC6, YBX2, EHP1, HNRNPD, AP4M1, HNRNPA1, PRKDC, PCSK1.                                                                              |
| E2F4DP1_01  | 94              | 0   | CDK1, RRM2, CDC6, H2AFZ, POLE2, CDC25A, ARHGAP11A, MCM6, DNAJC9, PCNA, GMNN, SNRPD1, PKMYT1, RANBP1, TMPO, MCM4, GINS3, MCM2, FBXO5, E2F1, FANCD2, UNG, ZNF367, EZH2, ATAD2, E2F8, STMN1, FANCG, GAPDH, MCM7, SASS6, CLSPN, SUV39H1, E2F7, CBX3, MAPK6, HMGA1, EED, PHF5A, GEN1, ATAD5, WDR62, MCM3, MSH2, MCM8, TOPBP1, SUMO1, TRA2B, CDCA7, DCK, HMGXB4, RBBP7, EIF4A1, HIST1H2AH, RBL1, POLE4, E2F3, MXD3, TRMT6, PRPS2, DCTPP1, CTDSPL2, LIG1, SYNGR4, POLD3, NOLC1, H2AFV, ZCCHC8, HNRNPR, AP1S1, MRPL40, ACBD6, MTF2, NASP, PRPS1, MAZ, CAND1, SMC6, YBX2, HIST1H4A, EHP1, HNRNPD, HNRNPA2B1, AP4M1, PRKDC, PCSK1, FANCC, NCL, USP37, POLD1, CDC5L, DNMT1, IER5L, NUP62.                  |
| E2F1_Q6     | 96              | 0   | CDK1, RRM2, CDC6, H2AFZ, POLE2, CDC25A, ARHGAP11A, MCM6, DNAJC9, CDT1, PCNA, GMNN, SNRPD1, PKMYT1, RANBP1, TMPO, MCM4, GINS3, MCM2, FBXO5, E2F1, FANCD2, UNG, ZNF367, EZH2, ATAD2, E2F8, STMN1, FANCG, GAPDH, MCM7, SASS6, CLSPN, SUV39H1, E2F7, CBX3, HMGA1, EED, PHF5A, GEN1, ATAD5, WDR62, MCM3, MSH2, MCM8, GPN3, TOPBP1, SUMO1, TRA2B, CDCA7, DCK, HMGXB4, HIST1H2AH, KPNB1, RBL1, SLC25A3, POLE4, E2F3, MXD3, TRMT6, PRPS2, DCTPP1, CTDSPL2, SYNGR4, POLD3, NOLC1, H2AFV, SERBP1, ZCCHC8, HNRNPR, AP1S1, MRPL40, ACBD6, MTF2, NASP, ZBTB80S, PRPS1, MAZ, CAND1, SMC6, YBX2, HIST1H4A, EHP1, HNRNPD, HNRNPA2B1, AP4M1, PRKDC, PCSK1, FANCC, NCL, USP37, POLD1, CDC5L, DNMT1, IER5L, NUP62. |
| E2F_02      | 93              | 0   | CDK1, RRM2, CDC6, H2AFZ, POLE2, CDC25A, ARHGAP11A, MCM6, DNAJC9, PCNA, GMNN, SNRPD1, PKMYT1, RANBP1, TMPO, MCM4, GINS3, MCM2, FBXO5, E2F1, FANCD2, UNG, ZNF367, EZH2, ATAD2, E2F8, STMN1, FANCG, GAPDH, MCM7, SASS6, CLSPN, SUV39H1, E2F7, CBX3, MAPK6, HMGA1, EED, PHF5A, GEN1, ATAD5, WDR62, MCM3, MSH2, MCM8, PTMA, TOPBP1, SUMO1, TRA2B, CDCA7, DCK, HMGXB4, EIF4A1, HIST1H2AH, RBL1, POLE4, E2F3, MXD3, TRMT6, PRPS2, DCTPP1, CTDSPL2, SYNGR4, POLD3, NOLC1, H2AFV, ZCCHC8, HNRNPR, AP1S1, MRPL40, ACBD6, MTF2, NASP, PRPS1, MAZ, CAND1, SMC6, YBX2, HIST1H4A, EHP1, HNRNPD, HNRNPA2B1, AP4M1, PRKDC, PCSK1, FANCC, NCL, USP37, POLD1, CDC5L, DNMT1, IER5L, NUP62.                         |

Abbreviations: LeadingEdgeNum, the number of leading edge genes; FDR, false discovery rate from Benjamini and Hochberg from gene set enrichment analysis (GSEA).
